# Supplementary material for: Graphene-Based Coating to Mitigate Biofilm Development in Marine Environments
Source: MDPI journal article supplement (doi:10.3390/nano13030381), 2023-01-18
Supplement: s1 [file s1]

## Supplementary Material

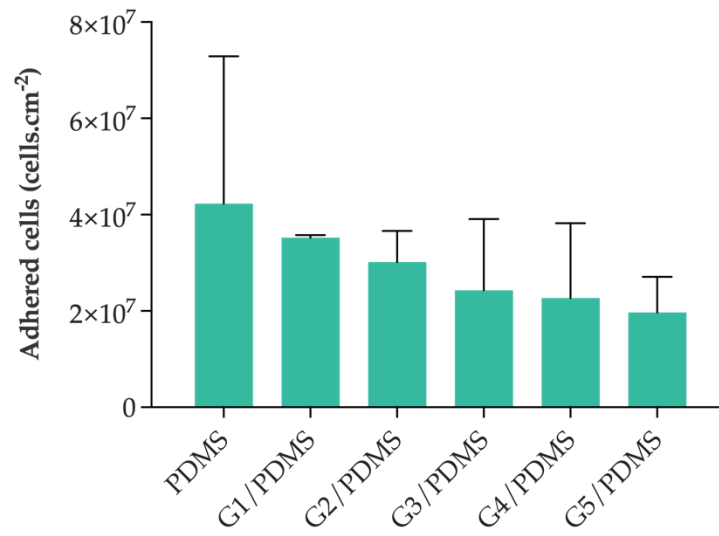

**Figure S1.** *C. marina* adhered cells on PDMS, G1/PDMS, G2/PDMS, G3/PDMS, G4/PDMS, and G5/PDMS surfaces after incubation for 7.5 h at 185 rpm. Results are presented as mean  $\pm$  SD.

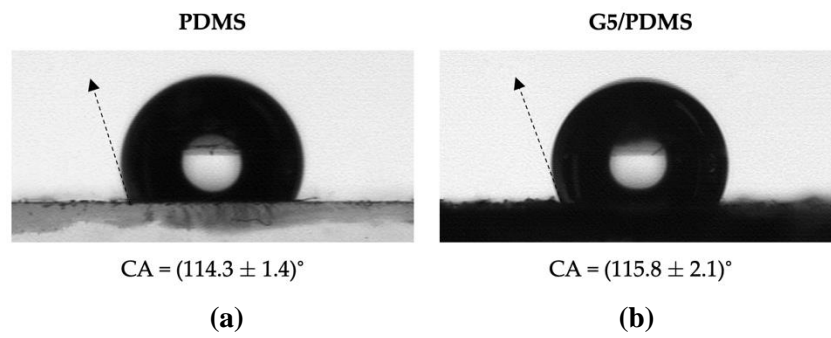

**Figure S2.** Representative images of water contact angle (CA) measurements on PDMS (a) and G5/PDMS (b) surfaces.

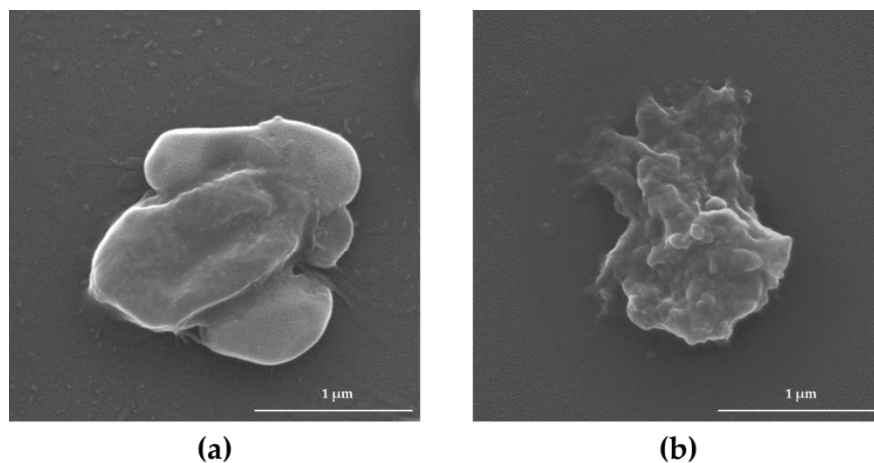

**Figure S3.** Scanning Electron Microscopy (SEM) of *C. marina* cells not exposed (a) and exposed to GNP 5% (w/v) (b) for 24 h (magnification of 50,000× and white scale bars of 1 μm). Cell damage occurred in bacterial cells exposed to graphene.

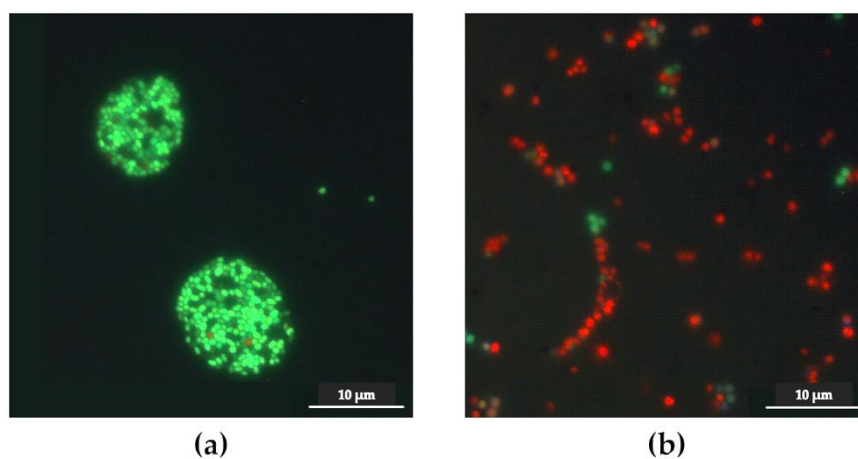

**Figure S4.** Epifluorescence microscopy visualization of *C. marina* cells not exposed (a) and exposed to GNP 5% (w/v) (b) for 24 h (scale bars of 10 μm). Viable cells appear green and dead cells appear red after being stained with the Invitrogen Live/Dead® kit.
